# Supplementary material
Source: PubMed Central journal article supplement (PMC5721982)
Supplement: supplementary_material(1).pdf [file supplementary_material%281%29.pdf]

**Supplementary Table 1. Comparison of the baseline demographics of the two cohorts**

| Variable                                                 | Edmonton cohort (n=225) | Barcelona cohort (n=146) | P value | Total group (n=371)    |
|----------------------------------------------------------|-------------------------|--------------------------|---------|------------------------|
|                                                          | % (n) or mean $\pm$ SD  | % (n) or mean $\pm$ SD   |         | % (n) or mean $\pm$ SD |
| <b>Demographics and pre-AVH meds and vitals</b>          |                         |                          |         |                        |
| Male gender                                              | 72.9% (164)             | 76.0% (111)              | 0.55    | 74.1% (275)            |
| Age (years)                                              | 54.7 $\pm$ 11.9         | 58.3 $\pm$ 13.0          | 0.006   | 56.1 $\pm$ 12.4        |
| On oral PPI therapy                                      | 31.6% (71)              | 47.9% (70)               | 0.002   | 38% (141)              |
| On non-selective beta blockers                           | 10.2% (23)              | 57.9% (84)               | 0.001   | 28.8% (107)            |
| On outpatient antibiotic prophylaxis                     | 5.3% (12)               | 17.8% (26)               | 0.001   | 10.2% (38)             |
| Inpatient at the time of the bleed                       | 12% (27)                | 7% (10)                  | 0.11    | 10% (37)               |
| <b>Liver disease etiology and severity</b>               |                         |                          |         |                        |
| Alcohol related                                          | 44.9% (101)             | 37.0% (54)               | 0.16    | 41.8% (155)            |
| HCC                                                      | 6.8% (15)               | 13.7% (20)               | 0.03    | 9.4% (35)              |
| Ascites on day of bleed                                  | 72.0% (162)             | 31.5% (46)               | 0.001   | 56.1% (208)            |
| Past history variceal bleeding                           | 61% (137)               | 44.5% (65)               | 0.002   | 54.4% (202)            |
| Past history of hepatic encephalopathy                   | 29% (65)                | 16% (23)                 | 0.004   | 24% (88)               |
| MELD                                                     | 17.0 $\pm$ 7.2          | 14.8 $\pm$ 5.0           | 0.001   | 16.2 $\pm$ 6.5         |
| CP score                                                 | 9.4 $\pm$ 2.1           | 7.6 $\pm$ 1.7            | 0.001   | 8.7 $\pm$ 2.1          |
| <b>Labs</b>                                              |                         |                          |         |                        |
| Sodium (mmol/L)                                          | 136.7 $\pm$ 6.0         | 137.1 $\pm$ 5.5          | 0.47    | 136.7 $\pm$ 5.8        |
| Peripheral blood leukocytes ( $\times 10^9$ cells/L)     | 10.3 $\pm$ 6.4          | 6.9 $\pm$ 3.5            | 0.001   | 9.0 $\pm$ 5.7          |
| INR                                                      | 1.6 $\pm$ 0.5           | 1.5 $\pm$ 0.5            | 0.36    | 1.6 $\pm$ 0.5          |
| Hemoglobin (mmol/L)                                      | 87.8 $\pm$ 22.4         | 91.8 $\pm$ 24.0          | 0.11    | 89.4 $\pm$ 23.1        |
| Creatinine ( $\mu$ mol/L)                                | 105.0 $\pm$ 69.1        | 100.4 $\pm$ 64.1         | 0.52    | 103.2 $\pm$ 67.1       |
| Bilirubin ( $\mu$ mol/L)                                 | 83.3 $\pm$ 125.9        | 35.1 $\pm$ 45.3          | 0.001   | 64.1 $\pm$ 104.4       |
| Albumin (g/L)                                            | 26.5 $\pm$ 7.5          | 28.7 $\pm$ 5.2           | 0.002   | 27.4 $\pm$ 6.7         |
| <b>AVH treatment and outcomes</b>                        |                         |                          |         |                        |
| Failure to control bleeding or re-bleeding within 5 days | 16.9% (38)              | 13.7% (20)               | 0.47    | 15.6% (58)             |
| Rebleeding within 6 weeks                                | 24.0% (54)              | 20.5% (30)               | 0.45    | 22.6% (84)             |
| TIPS done for                                            | 9% (20)                 | 26% (38)                 | 0.001   | 15.6% (58)             |

|                                |            |            |       |            |
|--------------------------------|------------|------------|-------|------------|
| <b>bleeding</b>                |            |            |       |            |
| <b>Early TIPS</b>              | 0% (0)     | 15.1% (22) | 0.001 | 5.9% (22)  |
| <b>Intubated for the bleed</b> | 28% (64)   | 24% (35)   | 0.34  | 27% (99)   |
| <b>6 week mortality</b>        | 17.3% (39) | 11.0% (16) | 0.10  | 14.8% (55) |

PPI, proton pump inhibitor ; HCC, hepatocellular carcinoma ; MELD, model for end stage liver disease ; CP, Child Pugh score ; AVH, acute variceal hemorrhage

**Supplementary Table 2.** Type and microbiology of infections divided by the type of antibiotic prophylaxis provided (FQ versus Ceph3 + Other)

|                                                       | <b>FQ prophylaxis<br/>(n=191)</b> | <b>Ceph3 or other<sup>s</sup> prophylaxis<br/>(n=180)</b> |
|-------------------------------------------------------|-----------------------------------|-----------------------------------------------------------|
| <b>Prevalence</b>                                     | <b>18 (9%)</b>                    | <b>33 (18%)</b>                                           |
| <b>Type of infection</b>                              |                                   |                                                           |
| • <b>Respiratory</b>                                  | 56% (10/18)                       | 52% (17/33)                                               |
| • <b>UTI</b>                                          | 17% (3/18)                        | 18% (6/33)                                                |
| • <b>S. bacteremia</b>                                | 17% (3/18)                        | 15% (5/33)                                                |
| • <b>SBP</b>                                          | 5% (1/18)                         | 15% (5/33)                                                |
| • <b>Line infx</b>                                    | 5% (1/18)                         | 0% (0/33)                                                 |
| <b>Culture positive infections</b>                    |                                   |                                                           |
|                                                       | 72% (13/18)                       | 76% (25/33)                                               |
| <b>Gram-negative organisms</b>                        |                                   |                                                           |
| <i>Escherichia coli</i>                               |                                   | 5* (1 QR, 2 CR)                                           |
| <i>Pseudomonas aeruginosa</i>                         | 5** (0 QR, 5 CR)                  | 3 (1 QR, 3 CR)                                            |
| <i>Citrobacter spp</i>                                | 1 (0 QR, 1 CR)                    | 1 (0 QR, 1 CR)                                            |
| <b>Gram-positive organisms</b>                        |                                   |                                                           |
| <i>Enterococcus spp</i><br>(all Vancomycin sensitive) | 4 (4 QR, 4 CR)                    | 7 (7 QR, 7 CR)                                            |
| <i>Streptococcus pneumoniae</i>                       | 1 (1 QR, 1 CR)                    |                                                           |
| <i>Streptococcus agalactiae</i>                       |                                   | 1 (0 QR, 0 CR)                                            |
| <i>viridans group Streptococcus</i>                   |                                   | 2 (1 QR, 0 CR)                                            |
| <i>Methicillin-susceptible Staphylococcus aureus</i>  | 1 (1 QR, 0 CR)                    | 3 (3 QR, 0 CR)                                            |
| <i>Methicillin-resistant Staphylococcus aureus</i>    |                                   | 1 (1 QR, 1 CR)                                            |
| <i>Staphylococcus ludunensis</i>                      | 1 (1 QR, 0 CR)                    |                                                           |
| <i>Staphylococcus hominis</i>                         |                                   | 1 (1 QR, 1 CR)                                            |
| <i>Mycoplasma pneumoniae</i>                          |                                   | 1 (1 QR, 0 CR)                                            |
| <b>Totals</b>                                         | 7/13 QR (54%)<br>11/13 CR (85%)   | 16/25 QR (64%)<br>15/25 CR (60%)                          |

FQ, fluoroquinolone ; Ceph3, third-generation cephalosporin ; CR, third-generation cephalosporin resistant; QR, quinolone resistant.

§Antibiotics in the Other category were Piperacillin-Tazobactam (7/13), Cloxacillin (1/13), Ampicillin/Flagyl (2/13), Clindamycin (3/13)

\*1 infection was Mixed Gram-neg and Gram-pos with MSSA

\*\*1 infection was 2 organisms, *Pseudomonas* and *Stenotrophomonas maltophilia*
